# Supplementary material for: Impairment in Working Memory and Executive Function Associated with Mercury Exposure in Indigenous Populations in Upper Amazonian Peru
Source: MDPI journal article supplement (doi:10.3390/ijerph191710989), 2022-09-02
Supplement: s1 [file s1]

# Supplementary Section S1

## Word Span Stimuli in English, Spanish, and Matsigenka

| Category     | English   | Spanish       | Matsigenka   |
|--------------|-----------|---------------|--------------|
| Objects (12) | Arrow     | Flecha        | Chakopi      |
|              | Basket    | Canasta       | Kantiri      |
|              | Blanket   | Manta         | Magatsi      |
|              | Box       | Caja          | Tsivogo      |
|              | Clothes   | Ropas         | Manchakintsi |
|              | Hook      | Anzuela       | Tsagarontsi  |
|              | Hut/House | Choza/Casa    | Pankotzi     |
|              | Knife     | Cuchillo      | Kotsiro      |
|              | Pot       | Olla de Metal | Hiromanka    |
|              | Rope      | Soga          | Tapetsa      |
| Human (10)   | Daughter  | Hija          | Shinto       |
|              | Ear       | Oreja         | Gempita      |
|              | Foot      | Pie           | Gititsi      |
|              | Hair      | Pelo          | Guisichi     |
|              | Hand      | Mano          | Ako          |
|              | Leg       | Pierna        | Boritsi      |
|              | Man       | Hombre        | Sürari       |
|              | Son       | Hijo          | Tomi         |
|              | Woman     | Mujer         | Tsinane      |
| Nature (14)  | Banana    | Platano       | Parianti     |
|              | Bird      | Pajaro        | Tsiriape     |
|              | Cassava   | Yuca          | Sekatsi      |
|              | Dog       | Perro         | Otsiti       |
|              | Firewood  | Lena          | Chichi       |
|              | Fish      | Pez           | Shima        |
|              | Flower    | Flor          | Kategari     |
|              | Moon      | Luna          | Kashiri      |
|              | Night     | Noche         | Chapini      |
|              | Plant     | Pintura       | Ana          |
|              | Red       | Rojo          | Kirahari     |
|              | River     | Rio           | Oakü         |
|              | Seed      | Semilla       | Okitsoki     |
|              | Sky       | Cielo         | Inküte       |
|              | Sun       | Sol           | Kenti        |
|              | Tree      | Arbol         | Inchanto     |
|              | Water     | Agua          | Nia          |

## Supplementary Section S2

### Analysis for Set Size Differences across Communities for Word Span, Corsi Block, and SOPT Errors

#### Word Span

Successful performance at the practice trials and lowest levels is important because it indicates that participants understood task expectations, could follow instructions, and could hold some verbal information in short-term memory. It was expected that recall would become more difficult with increased words presented and, indeed, mean recall accuracy for the set size of four items dropped to 0.76 (sd = 0.29) with perfect recall on at least one trial by 73% of participants. The mean recall accuracy dropped sharply for the set size of 5 items to 0.43 (sd = 0.25) with only 10% of participants getting a full score for a set size of 5 items. At the highest level, the mean accuracy was 0.24 (sd = 0.21) and only one participant could recall all 6 items. A repeated-measures ANOVA for set sizes was significant,  $F(3, 119) = 40.09$  ( $p < 0.01$ ),  $\omega^2 = 0.49$ , and Tukey's HSD post-hoc confirmed the largest differences between the set sizes between 4 and 5 ( $p < 0.01$ ).

#### Corsi Block

At the lowest set size of 3, the mean accuracy was 0.86 (sd = 0.24) and 97% of participants were able to successfully recall block locations on at least one trial past successful completion of the practice trials. As expected, when set size increased the recall accuracy decreased: For the set size of four, the mean accuracy was 0.68 (sd = 0.32) and 67% of participants were able to recall at least one trial in perfect order. For the set size of five, the mean accuracy was 0.47 (sd = 0.32) with 40% of participants able to recall at least one trial in perfect order. For the highest set size of six, the mean accuracy was 0.49 (sd = 0.36) but the number of participants able to recall at least one trial in perfect order increased by 10% so that half could recall at least one trial correctly. The main effect of set size was significant,  $F(3, 119) = 10.35$ ,  $p < 0.01$ ,  $\omega^2 = 0.19$ , and post-hoc comparisons showed differences between incremental set sizes of 4 and 5 ( $p = 0.04$ , Tukey's HSD).

#### SOPT Errors

At the lowest level, the mean error score was 0.47 (sd = 0.63) and 60% participants were able to complete the trial without any errors. For the set size of 6, the mean error score was 1.53 (sd = 0.82) with only 7% of participants able to respond without error. At the highest set size of 8 shapes, the mean error score was 2.33 (sd = 1.06) and all 30 participants made at least one error. An ANOVA for set sizes was significant,  $F(2, 89) = 46.93$ ,  $p < .01$ ,  $\omega^2 = 0.50$ , and a Tukey's post-hoc comparison showed significant differences between set sizes of 4 and 6 ( $p < .01$ ) and set sizes 6 and 8 ( $p < 0.01$ ).
